1 **Title:** Pollen contaminated with field-relevant levels of cyhalothrin affects honey bee survival,  
2 nutritional physiology, and pollen consumption behavior

3

4 **Authors:** Adam G Dolezal (1), Jimena Carrillo-Tripp (2), W. Allen Miller (2), Bryony C.  
5 Bonning (3), Amy L. Toth (1,3)

6

7 **Affiliations:** (1) Department of Ecology, Evolution, and Organismal Biology, (2) Department of  
8 Plant Pathology and Microbiology, (3) Department of Entomology, Iowa State University,  
9 Ames, IA USA

10

11 **Keywords:** honey bee, *Apis mellifera*, insecticide, sublethal dose, nutrition, behavior

12

13 **Corresponding author:** Adam G Dolezal, [adolezal@gmail.com](mailto:adolezal@gmail.com)

14 **Abstract:**

15 Honey bees are exposed to a variety of environmental stressors that impact their health,  
16 including nutritional stress, pathogens, and chemicals in the environment. In particular, there has  
17 been increasing evidence that sublethal exposure to pesticides can cause subtle, yet important  
18 effects on honey bee health and behavior. Here, we add to this body of knowledge by presenting  
19 data on bee-collected pollen containing sublethal levels of cyhalothrin, a pyrethroid insecticide,  
20 which, when fed to young honey bees, results in significant changes in lifespan, nutritional  
21 physiology, and behavior. For the first time, we show that when young, nest-aged bees are  
22 presented with pollen containing field-relevant levels of cyhalothrin, they reduce their  
23 consumption of contaminated pollen. This indicates that, at least for some chemicals, young bees  
24 are able to detect contamination in pollen and change their behavioral response, even if the  
25 contamination levels do not prevent foraging honey bees from collecting the contaminated  
26 pollen.

## 27 **Introduction**

28           Pollinators are a critical element in healthy ecosystems and key players in sustainable  
29 crop production (Ashman et al. 2004, Klein et al. 2007, Aizen et al. 2009). Native and managed  
30 bees are among the most important pollinators, but in recent years pollinator populations have  
31 plummeted. This is of major concern to ecosystem health and to food security worldwide (Gallai  
32 et al. 2009), and the repercussions may contribute significantly to global environmental change  
33 (Aizen et al. 2009). Pollinator declines are an area of vigorous research, and all indications are  
34 that these declines are the result of multiple, interacting stressors including habitat degradation,  
35 agricultural intensification, environmental toxins such as insecticides, and an increased spread of  
36 bee diseases as a result of globalization (Oldroyd 2007, Naug 2009, Goulson et al. 2015).

37           Among these factors, there has been increasing concern over the effects of sublethal  
38 doses of pesticides on bee health. While it is clear that high levels of insecticides can cause  
39 mortality in honey bees (Johnson et al. 2010), many recent studies have shown that lower,  
40 sublethal doses can have effects on many facets of honey bee biology, including behavior  
41 (Suchail et al. 2001, Williamson et al. 2013), learning (Decourtye et al. 2004, Frost et al. 2013),  
42 colony development (Dai et al. 2010, Wu et al. 2011, Gill et al. 2012), and increased  
43 susceptibility to several pathogens (Pettis et al. 2012, Pettis et al. 2013, Doublet et al. 2014).  
44 Honey bees encounter pesticides, at lethal and sublethal doses, through a variety of routes. For  
45 example, whole hives and even apiaries can be exposed to insecticidal sprays or contaminated  
46 planter dust and beekeepers often introduce miticides directly into hives. Foraging honey bees  
47 can be exposed directly to pesticides on treated plant materials, and hive bees can be exposed  
48 through plant products returned to the hive by foragers (Johnson et al. 2010, Krupke et al. 2012).  
49 These multiple routes of exposure contribute to the presence of a wide variety of pesticides

50 inside of most honey bee hives (Mullin et al. 2010). It is well-known that pesticide-contaminated  
51 pollen is often collected by foraging workers and brought into colonies; exposure to this pollen  
52 can then result in negative impacts on bee health (Pettis et al. 2012, Pettis et al. 2013, Doublet et  
53 al. 2014).

54         One common class of insecticides, the pyrethroids, is used on a wide variety of crops,  
55 including many orchard crops such as almonds, apples, and cherries (Epstein et al. 2000), and is  
56 the most prevalent class of insecticides found in bee-collected pollen (Mullin et al. 2010).  
57 Pyrethroids have reported repellent effects on honey bee foragers, and exposure causes already-  
58 foraging bees to decrease foraging activity (Fries and Wibran 1987, Rieth and Levin 1988,  
59 Decourtye et al. 2004) and increases the number of non-foraging behaviors exhibited by these  
60 foragers (Cox and Wilson 1984). Both of these behavioral changes result in an overall reduction  
61 of colony foraging activity (Fries and Wibran 1987, Rieth and Levin 1988). Nonetheless,  
62 pyrethroids are commonly found inside honey bee hives (Mullin et al. 2010), showing that, even  
63 if there is reduced foraging, pyrethroid-contaminated pollen is being collected by forager bees at  
64 a non-negligible level. However, while foraging workers collect this pollen and bring it into the  
65 hive, they rarely consume or store pollen themselves; instead, younger hive bees accept, process  
66 and consume this pollen (Winston 1987). After contaminated pollen reaches the hive, there is  
67 still much we do not know about how hive bees accept or reject such pollen and to what extent it  
68 is consumed. This is a key gap in our knowledge, and filling it would provide important  
69 information about actual exposure of hive bees to insecticides and their health effects, as well as  
70 valuable information about whether bees have behavioral mechanisms that allow them to avoid  
71 contaminants in their food.

72 To address these gaps in our knowledge about the responses of bees to field-relevant  
73 doses of pesticides, we took advantage of some readily available, bee-collected pollen that was  
74 discovered to be contaminated with lambda-cyhalothrin, a common pyrethroid insecticide (e.g.,  
75 Karate®). Cyhalothrin levels in this pollen were moderate to high, containing levels below the  
76 reported LD<sub>50</sub> (790 ppb), but higher than the average found in previous surveys of bee hives  
77 (Mullin et al. 2010). We first performed a series of experiments that tested the effects of bee-  
78 collected pollen from several different plant sources, each contaminated with different levels of  
79 cyhalothrin, on the survival, nutritional physiology, and pollen consumption behavior of young,  
80 laboratory-kept bees. Next, we used a more refined approach by comparing matched pollen  
81 sources that had been experimentally spiked with controlled, field-relevant doses of cyhalothrin.  
82 We then observed pollen consumption behavior in both cages of bees in the laboratory and in  
83 small nucleus hives kept in the field. Our data show effects of pollen source and contamination  
84 on survival and nutritional physiology, and also show that young honey bees change their  
85 behavior towards pollen contaminated with this insecticide to reduce pollen consumption.

86

## 87 **Methods**

### 88 *Bee collected pollen acquisition and pesticide testing*

89 We purchased approximately 5 kg of bee-collected, corbicular pollen that had been  
90 pooled from hives in a single apiary in southern Minnesota from a commercial, non-migratory  
91 beekeeper. All pollen had been collected in a period of less than one week in May 2012. We then  
92 sorted the corbicular pollen pieces by color, which is commonly used as a rough metric for  
93 species differences (Schmidt et al. 1987). Subsequently, we used molecular methods to identify

94 the major plant species that was the source of each of the sorted pollen types by following a  
95 barcode protocol using the chloroplast *rbcL* gene sequence (Little et al. 2004). The complete  
96 blend of pollen contained at least 5 pollen species, determined by pollen color, with the most  
97 abundant being *Taraxacum sp.* (dandelion) and *Salix sp.* (willow), each of which made up  
98 approximately 8% by mass of the total blend. The polyfloral blend, sorted *Taraxacum*, and  
99 sorted *Salix* were then sent in 3 g aliquots to the USDA-AMS-NSL in Gastonia, NC for pesticide  
100 residue analysis using GC-MS (Lehotay et al. 2005, Mullin et al. 2010). This screening revealed  
101 that the polyfloral blend contained 82.5 ppb of cyhalothrin, *Salix* contained 10.6 ppb, and  
102 *Taraxacum* contained 280 ppb, all of which are substantially lower than the previously  
103 calculated LD<sub>50</sub> dose for honey bees, 790 ppb (Mullin et al. 2010). Samples were also screened  
104 for 173 other pesticides, and only one other was detected - the herbicide atrazine. Atrazine was  
105 detected in the polyfloral blend and *Salix* at levels (12 ppb and 17 ppb, respectively), similar to  
106 the mean found by Mullin et al. (2010, 13.6 ppb), which are unlikely to cause mortality effects in  
107 caged bees (Helmer et al. 2014).

#### 108 *Feeding of caged bees on unmanipulated bee-collected pollen*

109 In August and September 2012, we performed three replicates of experiments where  
110 cages of 60 bees were fed either no pollen (replicate 1=7 cages, replicate 2 = 8 cages, replicate  
111 3=20 cages, total n=35 cages), a polyfloral blend of pollen (replicate 1=7 cages, replicate 2=9  
112 cages, replicate 3=19 cages, total n=35 cages), *Salix sp.* pollen (replicate 1=5 cages, replicate 2=5  
113 cages, replicate 3=5 cages, total n=15 cages) or *Taraxacum sp.* pollen (replicate 1=6 cages,  
114 replicate 2=5 cages, replicate 3=11 cages, total n=22 cages). Cages were set up by removing  
115 frames from at least three hives in our research apiary, removing adult bees by brushing, and  
116 then keeping frames overnight to allow collection of newly emerged bees the following day.

117 Bees used for the experiment were from healthy colonies, and showed no substantial infection  
118 with common honey bee viruses (Supplementary information). Next, 60 bees were counted out  
119 by hand into the small acrylic cages (10.16 cm x 10.16 cm x 7.62 cm), which were then stored in  
120 an incubation room at 32°C and 50% relative humidity. After the addition of bees to all cages,  
121 cages received approximately 0.2 grams wet weight of ground, bee-collected pollen (or no  
122 pollen) and had *ad libitum* access to a feeder of 50% sucrose solution. Pollen was replaced daily  
123 for the first 7 days (pilot experiments showed cessation of pollen consumption by this time), and  
124 cages were monitored for mortality daily for 26 days, after which mortality in some treatments  
125 was too high to continue. After the first two independent replicates of this design, we anecdotally  
126 observed that bees fed the *Taraxacum* pollen pushed pollen out of their cages (Fig. 1). Therefore,  
127 in the third replicate, we also recorded pollen consumption in each cage (polyfloral n=20 cages;  
128 *Salix* n=6 cages; dandelion n=11 cages). To monitor pollen consumption, we added precisely 0.2  
129 grams of wet weight pollen to each cage daily, and then carefully removed any remaining pollen  
130 24 hours later. This pollen was then dehydrated in a drying oven for 48 hours, and its mass  
131 compared to the dry weight equivalent of 0.2 grams wet weight pollen from the same source. In  
132 all three replicates, we also collected a subset of 2 bees from each cage at day 14 for analysis of  
133 lipid content and the presence of viruses (Supplementary information).

134 To analyze differences in survival between cages in different treatments, we created a  
135 survival table and used a Cox proportional hazards regression model using the package [survival]  
136 and the R function (coxph), controlling for cage number, variation in starting population, and  
137 replicate number. Unless noted otherwise, subsequent statistical analyses were also performed  
138 using R. To adjust for multiple comparisons, we used the Benjamini-Hochberg false discovery  
139 rate procedure (Benjamini and Hochberg 1995), resulting in an adjusted alpha value of 0.033.

140 For the final replicate, we evaluated differences in pollen consumption by comparing the total  
141 pollen consumed per bee during the 6 days of pollen consumption. Since data did not fit  
142 normality or homogeneity of variance assumptions, we tested for differences using a Kruskal-  
143 Wallis ANOVA followed by a Steel-Dwass posthoc test using JMP statistical software.

144

#### 145 *Lipid analysis*

146 After collection, the gut of each bee was removed to prevent food stored in the gut from  
147 influencing the results. Bees were then processed for lipid quantification using a phospho-  
148 vanillin spectrophotometric assay commonly used on honey bees (Toth and Robinson 2005).  
149 Lipid content concentration from two bees per cage inform the different treatment groups was  
150 compared, with source cage as a factor, using an ANOVA model followed by a Tukey HSD  
151 posthoc test.

152

#### 153 *Feeding of caged bees on experimentally contaminated pollen*

154 In June 2014, we mixed newly emerged bees derived from 6 apiary colonies, and then  
155 counted 30 bees into each cage, setting up 12 cages per treatment group. Cages received either  
156 unmanipulated polyfloral pollen (identical to previous cages, and thus containing 82.5 ppb  
157 cyhalothrin), or polyfloral pollen experimentally contaminated with either 140 ppb, 280 ppb, or  
158 560 ppb cyhalothrin. We used the same pollen source that had been used in previous  
159 experiments, which had been stored frozen at -20°C. While some degradation to pollen  
160 nutritional quality could have occurred, frozen pollen maintains substantial nutritional quality  
161 even after years of frozen storage (Dietz and Stevenson 1980). Furthermore, comparisons were



162 only made within experiments using the same-aged pollen, and therefore any quality degradation  
163 will not affect our interpretation of the results. These doses were chosen because the field-  
164 collected *Taraxacum* pollen contained 280 ppb of cyhalothrin, and hence these doses should  
165 represent a range of reasonable field-relevant levels of this insecticide. We assume that no  
166 changes in cyhalothrin concentration occurred in our stored pollen stock, as cyhalothrin is stable  
167 for multiple years when frozen (Drew et al. 2007). To produce the contaminated pollen, we used  
168 laboratory quality lambda-cyhalothrin (ChemService, West Chester, PA, USA), which we  
169 diluted into solution in distilled water. Then, 70  $\mu$ l of water or insecticide solution was added to  
170 0.2g (wet mass) pollen. Cages then received one of the different cyhalothrin treatments daily for  
171 8 days, and mortality was recorded for 14 days, which is where the largest differences in  
172 mortality had been observed in the first experiment. Pollen consumption was recorded using the  
173 same methods described above. In all treatment groups, very little pollen was consumed on day  
174 1, so this day was removed from analysis. To analyze differences in survival, we used the same  
175 Cox proportional hazard method described above. To compare pollen consumption over time, we  
176 used pairwise repeated measures ANOVA, controlling for cage and day (time) to prevent  
177 overinflation of sample size. To adjust for multiple comparisons between the pairwise tests, we  
178 used the Benjamini-Hochberg (Benjamini and Hochberg 1995) false discovery rate procedure,  
179 resulting in an adjusted alpha value of 0.0214.

180

### 181 *Feeding of field bees in nucleus hives with experimentally contaminated pollen*

182 To test these effects in a field setting, we created three nucleus hives in our research  
183 apiary in October 2014; each hive contained 5 frames of adult bees (approximately equal  
184 populations, estimated 8000 bees), one frame of capped brood, one frame containing open brood,

185 and a “pseudo-queen” (queen mandibular pheromone dummy, Mann-Lake, LTD, Hackensack,  
186 MN, USA) in lieu of a real queen (Toth and Robinson 2005). All frames used contained little  
187 pollen; what pollen was present was removed by scraping out of those cells. Throughout the  
188 remainder experiment, forager bees from all treatment groups were free to bring in pollen from  
189 outside sources. A 3 cm wooden ring was added to the top of each hive to allow a small dish of  
190 pollen to be added on the top bars of the frames without touching the lid of the hive. This  
191 approach was repeated three times, with three different nucleus hives, with a total of 9  
192 independent hives over a three week period in October 2014. We prepared polyfloral pollen with  
193 no added cyhalothrin, 280 ppb cyhalothrin, or 560 ppb cyhalothrin final concentration, as  
194 described above, but scaled to 5 g. Each day, 5 g of the appropriate pollen was weighed into a  
195 small plastic dish, which was then placed on the center top bar of a hive. With this arrangement,  
196 the pollen dish was inside of the hive and gave hive bees access to the pollen for consumption.  
197 Twenty four hours later, the dish was removed, the pollen was dried for 48 hours in drying oven,  
198 and the dry mass recorded. To control for hive-level effects, treatments were cycled across  
199 nucleus hives each day, so that each nucleus hive received each treatment, and a different  
200 treatment each day for 5 days per replicate (with a total of 15 days observed) Due to the effects  
201 of weather (rain, cold nights), there was large variation in the amount of pollen consumed each  
202 day (i.e., on some days, almost no pollen was consumed in any treatment, as bees remained  
203 clustered in the hive). To control for this, we calculated an average amount of pollen consumed  
204 among the focal hives each day, and then compared the amount of pollen a hive consumed to that  
205 average. This allowed for normalization for days in which very little pollen was consumed across  
206 the experiment versus days when a large quantity was consumed. Using the quantity of pollen  
207 consumed above the daily average for each hive, we compared pollen using pairwise repeated

208 measures ANOVA controlling for date of observation and hive. To adjust for multiple  
209 comparisons, we used Benjamini-Hochberg adjustment of 0.01667.

210

## 211 **Results**

### 212 *Cages fed unmanipulated field pollen*

#### 213 *Effect of field-collected pollen on survival*

214 First, we determined whether pollen source affects survival in caged bees. We fed caged  
215 honey bees field-collected pollen that contained moderate levels of cyhalothrin insecticide  
216 contamination. Our screening revealed that polyfloral pollen contained 82.5 ppb, *Salix* contained  
217 10.6 ppb, and *Taraxacum* contained 280 ppb, all of which are lower than reported LD<sub>50</sub> doses,  
218 but higher than previous reports of in-hive contamination of pollen (Mullin et al. 2010). Over a  
219 26 day period (Figure 2), survival of caged bees was not significantly different between bees fed  
220 no pollen (n=35), polyfloral pollen (n=35), or *Salix sp.* pollen (n=15) (Cox proportional hazard  
221 model, alpha corrected <0.033, p>0.033), but survival was significantly lower in the bees fed the  
222 *Taraxacum sp.* pollen (n=22) compared to those fed the polyfloral pollen (p =0.005), *Salix sp.*  
223 pollen (p=0.0005), or even bees fed no pollen at all (p=0.014). Overall, there were no significant  
224 difference in survival in the bees fed polyfloral, *Salix sp.*, or no pollen, and *Taraxacum sp.*- fed  
225 bees exhibited lower survival than any of the other groups.

226

#### 227 *Differential consumption of field-collected pollen*

228 To distinguish whether the above effects on honey bee survival were due to consumption  
229 of unhealthy pollen or due to reduced pollen consumption (or a combination of the two), we  
230 observed consumption levels of the different pollen sources. In cages of honey bees fed field-  
231 collected pollen, there were some significant differences in total pollen consumption between the  
232 groups (Fig. 1, 3). Over 5 days, the pollen consumed per bee per day did not differ between  
233 cages fed polyfloral pollen (n=20) and *Salix sp.* (n=6) (Kruskal-Wallis ANOVA, Steel-Dwass  
234 multiple comparison,  $p>0.05$ ), but bees fed *Taraxacum sp.* pollen (n=11) consumed significantly  
235 less pollen than bees in cages fed polyfloral pollen (Kruskal-Wallis ANOVA, Steel-Dwass  
236 multiple comparison,  $p<0.05$ ) or *Salix sp.* pollen (Kruskal-Wallis ANOVA, Steel-Dwass  
237 multiple comparison,  $p<0.05$ ).

238

#### 239 *Honey bee lipid content*

240 Lipid content is an indicator of bee health (Wilson-Rich et al. 2008), therefore we  
241 measured lipid content of the caged bees fed different pollen diets. As with survival, pollen diet  
242 also resulted in significant differences in their whole-body lipid content at day 14 (ANOVA,  
243  $p<0.05$ ). Polyfloral pollen-fed bees (n=40) did not have significantly different lipid stores than  
244 bees fed *Salix sp.* (n=16; Tukey HSD,  $p>0.05$ ), but did have higher lipid levels than bees fed no  
245 pollen (n=40) and bees fed *Taraxacum sp.* pollen (n=19; Tukey HSD,  $p<0.05$ ). There were no  
246 significant differences in lipid content between bees fed *Salix sp.*, no pollen, or *Taraxacum sp.*,  
247 showing that, overall, bees fed polyfloral pollen had the highest lipid content, bees fed *Salix sp.*  
248 had intermediate lipid stores (not significantly different from any other treatment group) and  
249 bees fed no pollen or *Taraxacum sp.* had the lowest (Fig. 4).

250

251 ***Effect of feeding pollen artificially treated with cyhalothrin insecticide***

252 *Mortality effects of cyhalothrin-treated polyfloral pollen*

253         Based on our findings from cages fed unmanipulated pollen, we hypothesized that the  
254 observed effects were caused by the sublethal contamination of some of the pollen sources, e.g.  
255 the *Taraxacum sp.* pollen, with cyhalothrin. However, this finding was confounded by the  
256 different levels of contamination in different pollen sources. Therefore, we artificially  
257 contaminated our polyfloral pollen blend with cyhalothrin levels similar to those found in field-  
258 collected pollen. In these cages, there were no significant differences in mortality due to pollen  
259 contamination over the 14 day observation period (Cox Proportional Hazard model,  $p > 0.05$ ,  
260 Supplemental Fig. 1).

261

262 *Pollen consumption*

263 We also evaluated whether pollen consumption was influenced by pollen source or cyhalothrin  
264 contamination alone. When pollen consumption in the cages that received cyhalothrin-  
265 contaminated polyfloral pollen was compared over time, the same pattern seen in cages fed field-  
266 collected pollen was observed (Fig. 5). Bees in control cages consumed significantly more pollen  
267 over time than bees fed pollen with 140 ppb cyhalothrin (repeated measures ANOVA, d.f.=1, 5;  
268  $F=21.44$ ; alpha corrected  $< 0.0214$ ,  $p=0.0057$ ), 280 ppb cyhalothrin (repeated measures ANOVA,  
269 d.f.=1,5;  $F= 52.62$ ; alpha corrected  $< 0.0214$ ,  $p=0.00078$ ,  $n=12$ ) or 560 ppb cyhalothrin (repeated  
270 measures ANOVA, d.f.=1,5;  $F=16.88$ ; alpha corrected  $< 0.0214$ ,  $p < 0.00928$ ).

271

272 *Nucleus hives fed pollen artificially treated with cyhalothrin*

273 *Pollen consumption*

274 To evaluate if the differences in pollen consumption observed in cages would occur in more  
275 field-relevant conditions, we used small nucleus hives in the field to test honey bee consumption  
276 of polyfloral pollen with three different cyhalothrin levels: no added cyhalothrin (note levels are  
277 not zero, but measured at 82.5 ppb), 280 ppb cyhalothrin-contaminated, and 560 ppb-  
278 contaminated. We found that when nucleus hives were presented with polyfloral pollen  
279 containing either no added cyhalothrin, the same dose found in field pollen (280 ppb) or double  
280 that dose (560 ppb), the highest dose resulted in significantly reduced consumption of pollen  
281 compared to control (Fig. 6). We found that hives consumed significantly less pollen over the  
282 daily average when treated with 560 ppb cyhalothrin than controls (repeated measures ANOVA,  
283 d.f.=1,9; F=22.65; p<0.01667), but consumption of pollen treated with 280 ppb cyhalothrin was  
284 not significantly different between consumption of control pollen and 560ppb cyhalothrin pollen  
285 (repeated measures ANOVA, d.f.=1,9; F=1.57; p>0.05).

286

287 **Discussion**

288 Here, we present new data adding to the large body of literature showing that exposure to  
289 pesticides in the environment can have important sublethal effects on honey bees that may not be  
290 evident in short term monitoring for lethal exposure (Suchail et al. 2001, Decourtye et al. 2004,  
291 Dai et al. 2010, Wu et al. 2011, Gill et al. 2012, Pettis et al. 2012, Frost et al. 2013, Pettis et al.  
292 2013, Williamson et al. 2013, Doublet et al. 2014). We show that exposure to some pollen

293 sources contaminated with cyhalothrin, a common pyrethroid insecticide, can significantly affect  
294 long term lifespan in caged laboratory bees and reduce lipid stores. Low lipid stores are  
295 associated with compromised nutrition and immunity (Alaux et al. 2010) and may thus have  
296 possible consequences to bee health. Furthermore, to the best of our knowledge, we show for the  
297 first time that honey bees in cages or hives are capable of detecting sub-lethal levels and  
298 reducing pollen consumption when presented with pollen contaminated with cyhalothrin, either  
299 directly from the field or using experimentally-treated pollen.

300 Caged, newly-emerged bees fed on *Taraxacum sp.* pollen that was contaminated with  
301 cyhalothrin exhibited significantly lower survival over a 26 day period than bees fed *Salix sp.* or  
302 a polyfloral blend, or even bees fed no pollen at all (Fig. 2). While it is well-established that bees  
303 survive best on polyfloral pollen, and that individual pollen varieties have different effects on  
304 lifespan and pathogen resistance (Schmidt 1984, Schmidt et al. 1987, Di Pasquale et al. 2013), it  
305 is surprising that bees fed no pollen at all would survive more than bees fed *Taraxacum sp.*  
306 pollen. While *Taraxacum* pollen is not an ideal source for bees, and honey bees are unable to  
307 raise brood successfully on a *Taraxacum* diet alone (Herbert et al. 1970), *Taraxacum* pollen has  
308 been reported to improve survival versus pollen-less controls, albeit not as much as many other  
309 pollen varieties (Schmidt et al. 1987). In any case, as bees commonly forage on *Taraxacum*  
310 pollen (Mayer et al. 1991), it could provide a significant source of hive nutrition, especially  
311 during the times of year when *Taraxacum* is one of the few plants blooming. Our finding that  
312 bees fed on *Taraxacum* pollen survived worse than bees fed on any other treatment groups  
313 makes sense in light of the higher cyhalothrin levels detected in this pollen.

314 We also found that bees fed *Taraxacum sp.* pollen consumed significantly less pollen  
315 than counterparts fed polyfloral or *Salix sp.* pollen (Fig. 1 and 4). Because bees will readily

316 forage for and consume *Taraxacum* pollen (Schmidt et al. 1987, Mayer et al. 1991, Alaux et al.  
317 2010), we hypothesized that the change in consumption was due to cyhalothrin contamination.  
318 Cyhalothrin has documented repellent properties on honey bees foraging in the field, causing a  
319 reduction in foraging behavior (Cox and Wilson 1984, Fries and Wibran 1987, Rieth and Levin  
320 1988, Decourtye et al. 2004); however, our pollen was collected by foraging honey bees in the  
321 field, and therefore must have been at a contamination level below a threshold for repellency.  
322 Our observations showed, however, that when just young bees (not old bees, such as the foragers  
323 that collected the pollen) are presented with this pollen, as they would be in a natural hive  
324 setting, they are able to detect contaminants in the pollen and respond by reducing pollen  
325 consumption. This reduced consumption was insufficient, however, to fully prevent the  
326 detrimental effects of the insecticide (Figs. 2 and 3).

327         However, it is problematic to make strong inferences about cyhalothrin effects based on  
328 observations of bees consuming cyhalothrin in the context of different pollen species. Therefore,  
329 we artificially treated our polyfloral pollen blend with cyhalothrin at three concentrations similar  
330 to that found in field-collected *Taraxacum sp.* pollen. When caged bees were fed this pollen,  
331 bees consumed significantly less pollen, whether the pollen contained 140 ppb (half of field  
332 collected), 280 ppb (identical to field collected) or 560 ppb (double field-collected), compared to  
333 controls fed pollen without added pesticide contamination (Fig. 5). This shows that, even  
334 comparing identical pollen sources, young (nest-aged) bees are less likely to consume pollen  
335 containing cyhalothrin at a level acceptable for collection by foraging bees. Surprisingly, when  
336 bees were fed polyfloral pollen experimentally treated with insecticide, we did not observe any  
337 significant differences in survival over the experimental period. However, since honey bee  
338 response to nutrition may buffer them against the effects of pesticides (Schmehl et al. 2014), it is



339 possible that our use of a higher-quality polyfloral diet prevented the subtle change in survival  
340 that was observed in bees fed only the *Taraxacum sp.* pollen source. Another possibility is that  
341 other environmental differences in the bees, due to differences in year and season of the  
342 experiment, contributed to a higher resistance to pesticide effects. Because these experiments  
343 were performed on different colonies, genetic variation in pesticide resistance could have  
344 affected our results.

345         Our observation that honey bees consume less pesticide-contaminated pollen was also  
346 validated in experiments using small nucleus hives in the field (Fig. 6). Although the difference  
347 in pollen consumption was not as strong as the findings from the cages, the trend of high  
348 consumption in controls, intermediate in 280 ppb-fed bees, and low consumption in 560 ppb-fed  
349 bees fits the same pattern. This is particularly notable because these nucleus hives contained a  
350 mixed age demography, compared to cages kept in the laboratory, which is more representative  
351 of full-sized hives. Therefore, our findings suggest that, even if foraging honey bees bring  
352 cyhalothrin-contaminated pollen into the hive (Mullin et al. 2010), the young bees that actually  
353 consume pollen may be less likely to consume cyhalothrin-contaminated pollen. However, more  
354 comprehensive choice tests would be necessary to fully test this hypothesis and to determine if  
355 the mechanism of detection requires consumption and if exposed bees discriminate only  
356 contaminated pollen or exhibit a more generalized rejection of all pollen due to insecticide  
357 poisoning.

358         Lipid content is a common metric for bee health, as it can provide a physiological  
359 measurement of diet quality and immunocompetence (Wilson-Rich et al. 2008), and lipid content  
360 can have important effects on pathogen resistance (Alaux et al. 2010) and behavior (Toth and  
361 Robinson 2005). Here, we found that bees fed polyfloral pollen had, unsurprisingly, higher lipid

362 content than bees fed no pollen, with bees fed a single source of *Salix sp.* showing somewhat  
363 lower, but not significantly different lipid levels. It is particularly notable that *Taraxacum sp.*-fed  
364 bees exhibited lipid content most similar to those fed no pollen at all. In a previous study by  
365 Alaux et al. (2010), bees fed any of multiple pollen sources, including *Taraxacum*, exhibited  
366 higher fat stores than those fed no pollen. While it is possible that our *Taraxacum*-fed bees  
367 contained lower lipid levels due to their overall reduction in pollen consumption, it seems  
368 unlikely that a reduction in pollen consumption would result in lipid levels as low as bees fed no  
369 pollen at all, especially knowing that *Taraxacum* normally increases fat stores compared to unfed  
370 controls (Alaux et al. 2010). Therefore, the effects on lipid content were likely driven by  
371 cyhalothrin contamination in the pollen, suggesting that pesticide exposure could negatively  
372 affect nutritional physiology. Furthermore, recent evidence has shown that diet can affect  
373 pesticide resistance in honey bees (Schmehl et al. 2014). Together, these findings show how this  
374 type of scenario could set the stage for a “vicious cycle” of pesticide contamination, causing  
375 damaging effects on nutritional physiology which in turns decreases pesticide resistance,  
376 potentially resulting in higher mortality (as observed in our first experiment). Because young  
377 bees need to consume pollen to produce hypopharyngeal gland secretions to feed developing  
378 larvae (Winston 1987), a reduction in pollen consumption and nutritional physiology in young  
379 bees could have trans-generational effects.

380 Overall, we provide data underlining the increasingly well-established fact that sublethal  
381 levels of pesticides are able to enter honey bee hives and can cause subtle physiological and  
382 behavioral effects that may be difficult to detect (Suchail et al. 2001, Wu et al. 2011, Pettis et al.  
383 2012, Pettis et al. 2013, Helmer et al. 2014). Furthermore, we present novel data showing that  
384 young honey bees, as well as small hives, can detect some types of contamination in pollen and

385 reduce consumption of that pollen. This effect is particularly important because it indicates that,  
386 even if contaminated materials are collected by foraging bees, the nest bees may not accept or  
387 consume all contaminated pollen. While we have observed this effect due to cyhalothrin  
388 contamination, it is not clear if this effect is widespread; it may be due to the reported repellant  
389 properties of pyrethroid insecticides (Cox and Wilson 1984, Rieth and Levin 1988). In fact,  
390 honey bees and bumble bees actually consume more sugar solution when it contains  
391 neonicotinoid insecticide contamination (Kessler et al. 2015); therefore, it is important to  
392 investigate how honey bees respond to different chemical contaminants, as they can result in  
393 completely opposite responses by bees. While previous reports indicated that pyrethroid  
394 insecticides caused external irritation to bees (i.e., the proboscis and antennae (Rieth and Levin  
395 1988)) consumption or tasting of the contaminant may be also be an important component of  
396 repellency, especially at lower doses. At lower contamination levels, foragers, which do not  
397 consume the pollen they collect, are not repelled by the presence of cyhalothrin, but hive bees  
398 that consume the pollen are. Future work will be necessary to investigate if foraging bees and  
399 hive bees simply have different thresholds for pyrethroid repellency, or if the ability of nest  
400 honey bees to reject pollen contaminated by insecticides is a more widespread mechanism.

401

#### 402 **Acknowledgments:**

403 We would like to thank Griffin Smith, Arvin Foell, Giselle Narvaez, and Catie Steinfadt for help  
404 with the experiments, and Ali Berens and Jennifer Jandt for comments on the manuscript and  
405 statistical advice. This work was supported by USDA-AFRI #2011-04894.

406

## 407 **References**

- 408 **Aizen, M. A., L. A. Garibaldi, S. A. Cunningham, and A. M. Klein. 2009.** How much does agriculture  
409 depend on pollinators? Lessons from long-term trends in crop production. *Ann Bot-London* 103:  
410 1579-1588.
- 411 **Alaux, C., F. Ducloz, D. Crauser, and Y. Le Conte. 2010.** Diet effects on honeybee immunocompetence.  
412 *Biol Letters* 6: 562-565.
- 413 **Ashman, T. L., T. M. Knight, J. A. Steets, P. Amarasekare, M. Burd, D. R. Campbell, M. R. Dudash, M. O.**  
414 **Johnston, S. J. Mazer, R. J. Mitchell, M. T. Morgan, and W. G. Wilson. 2004.** Pollen limitation of  
415 plant reproduction: Ecological and evolutionary causes and consequences. *Ecology* 85: 2408-  
416 2421.
- 417 **Benjamini, Y., and Y. Hochberg. 1995.** Controlling the False Discovery Rate - a Practical and Powerful  
418 Approach to Multiple Testing. *J Roy Stat Soc B Met* 57: 289-300.
- 419 **Cox, R. L., and W. T. Wilson. 1984.** Effects of Permethrin on the Behavior of Individually Tagged Honey  
420 Bees, *Apis-Mellifera* L (Hymenoptera, Apidae). *Environ Entomol* 13: 375-378.
- 421 **Dai, P. L., Q. Wang, J. H. Sun, F. Liu, X. Wang, Y. Y. Wu, and T. Zhou. 2010.** Effects of Sublethal  
422 Concentrations of Bifenthrin and Deltamethrin on Fecundity, Growth, and Development of the  
423 Honeybee *Apis Mellifera Ligustica*. *Environ Toxicol Chem* 29: 644-649.
- 424 **Decourtye, A., C. Armengaud, M. Renou, J. Devillers, S. Cluzeau, M. Gauthier, and M. H. Pham-**  
425 **Delegue. 2004.** Imidacloprid impairs memory and brain metabolism in the honeybee (*Apis*  
426 *mellifera* L.). *Pestic Biochem Phys* 78: 83-92.
- 427 **Di Pasquale, G., M. Salignon, Y. Le Conte, L. P. Belzunces, A. Decourtye, A. Kretzschmar, S. Suchail, J.-L.**  
428 **Brunet, and C. Alaux. 2013.** Influence of Pollen Nutrition on Honey Bee Health: Do Pollen  
429 Quality and Diversity Matter? *Plos One* 8: e72016.
- 430 **Dietz, A., and H. R. Stevenson. 1980.** Influence of Long-Term Storage on the Nutritional-Value of Frozen  
431 Pollen for Brood Rearing of Honey Bees. *Apidologie* 11: 143-151.
- 432 **Doublet, V., M. Labarussias, J. R. de Miranda, R. F. A. Moritz, and R. J. Paxton. 2014.** Bees under stress:  
433 sublethal doses of a neonicotinoid pesticide and pathogens interact to elevate honey bee  
434 mortality across the life cycle. *Environmental Microbiology*: n/a-n/a.
- 435 **Drew, W. T., K. Harper, A. Parmar, and M. Dow. 2007.** Lambda-Cyhalothrin. Human Health Risk  
436 Assessment for the Proposed Food/Feed Uses of the Insecticide on Cucurbit Vegetables (Group  
437 9), Tuberous and Corm Vegetables (Subgroup 1C), Grass Forage, Fodder, and Hay (Group 17),  
438 Barley, Buckwheat, Oat, Rye, Wild Rice, and Pistachios. Petition Numbers 5F6994, 3E6593, and  
439 6E7077. *In* E. P. Agency [ed.].
- 440 **Epstein, L., S. Bassein, and F. Zalom. 2000.** Almond and stone fruit growers reduce OP, increase  
441 pyrethroid use in dormant sprays. *Calif Agr* 54(6):14-19.
- 442 **Fries, I., and K. Wibran. 1987.** Effects on Honeybee Colonies Following Application of the Pyrethroids  
443 Cypermethrin and Pp-321 in Flowering Oilseed Rape. *Am Bee J* 127: 266-269.
- 444 **Frost, E. H., D. Shutler, and N. K. Hillier. 2013.** Effects of fluvalinate on honey bee learning, memory,  
445 responsiveness to sucrose, and survival. *J Exp Biol* 216: 2931-2938.
- 446 **Gallai, N., J. M. Salles, J. Settele, and B. E. Vaissiere. 2009.** Economic valuation of the vulnerability of  
447 world agriculture confronted with pollinator decline. *Ecol Econ* 68: 810-821.
- 448 **Gill, R. J., O. Ramos-Rodriguez, and N. E. Raine. 2012.** Combined pesticide exposure severely affects  
449 individual- and colony-level traits in bees. *Nature* 491: 105-U119.
- 450 **Goulson, D., E. Nicholls, C. Botías, and E. L. Rotheray. 2015.** Bee declines driven by combined stress  
451 from parasites, pesticides, and lack of flowers. *Science*.

- 452 **Helmer, S., A. Kerbaol, P. Aras, C. Jumarie, and M. Boily. 2014.** Effects of realistic doses of atrazine,  
453 metolachlor, and glyphosate on lipid peroxidation and diet-derived antioxidants in caged honey  
454 bees (*Apis mellifera*). *Environ Sci Pollut Res*: 1-12.
- 455 **Herbert, E. W., W. E. Bickley, and Shimanuk.H. 1970.** Brood-Rearing Capability of Caged Honey Bees  
456 Fed Dandelion and Mixed Pollen Diets. *J Econ Entomol* 63: 215-&.
- 457 **Johnson, R. M., M. D. Ellis, C. A. Mullin, and M. Frazier. 2010.** Pesticides and honey bee toxicity - USA.  
458 *Apidologie* 41: 312-331.
- 459 **Kessler, S. C., E. J. Tiedeken, K. L. Simcock, S. Derveau, J. Mitchell, S. Softley, J. C. Stout, and G. A.  
460 Wright. 2015.** Bees prefer foods containing neonicotinoid pesticides. *Nature* 521: 74-U145.
- 461 **Klein, A. M., B. E. Vaissiere, J. H. Cane, I. Steffan-Dewenter, S. A. Cunningham, C. Kremen, and T.  
462 Tschardt. 2007.** Importance of pollinators in changing landscapes for world crops. *P R Soc B*  
463 274: 303-313.
- 464 **Krupke, C. H., G. J. Hunt, B. D. Eitzer, G. Andino, and K. Given. 2012.** Multiple Routes of Pesticide  
465 Exposure for Honey Bees Living Near Agricultural Fields. *Plos One* 7.
- 466 **Lehotay, S. J., K. Mastovska, and S. J. Yun. 2005.** Evaluation of two fast and easy methods for pesticide  
467 residue analysis in fatty food matrixes. *J Aoac Int* 88: 630-638.
- 468 **Little, D. P., A. E. Schwarzbach, R. P. Adams, and C. F. Hsieh. 2004.** The circumscription and  
469 phylogenetic relationships of *Callitropsis* and the newly described genus *Xanthocyparis*  
470 (*Cupressaceae*). *Am J Bot* 91: 1872-1881.
- 471 **Mayer, D. F., J. D. Lunden, and R. E. Williams. 1991.** Tralomethrin Insecticide and Domesticated  
472 Pollinators. *Am Bee J* 131: 461-463.
- 473 **Mullin, C. A., M. Frazier, J. L. Frazier, S. Ashcraft, R. Simonds, D. vanEngelsdorp, and J. S. Pettis. 2010.**  
474 High levels of miticides and systemic agrochemicals in North American beehives: Implications for  
475 honey bee health. *Abstr Pap Am Chem S* 239.
- 476 **Naug, D. 2009.** Nutritional stress due to habitat loss may explain recent honeybee colony collapses. *Biol*  
477 *Conserv* 142: 2369-2372.
- 478 **Oldroyd, B. P. 2007.** What's killing American honey Bees? *Plos Biol* 5: 1195-1199.
- 479 **Pettis, J. S., D. vanEngelsdorp, J. Johnson, and G. Dively. 2012.** Pesticide exposure in honey bees results  
480 in increased levels of the gut pathogen *Nosema*. *Naturwissenschaften* 99: 153-158.
- 481 **Pettis, J. S., E. M. Lichtenberg, M. Andree, J. Stitzinger, R. Rose, and D. Vanengelsdorp. 2013.** Crop  
482 Pollination Exposes Honey Bees to Pesticides Which Alters Their Susceptibility to the Gut  
483 Pathogen *Nosema ceranae*. *Plos One* 8.
- 484 **Rieth, J. P., and M. D. Levin. 1988.** The Repellent Effect of 2 Pyrethroid Insecticides on the Honey Bee.  
485 *Physiol Entomol* 13: 213-218.
- 486 **Schmehl, D. R., P. E. Teal, J. L. Frazier, and C. M. Grozinger. 2014.** Genomic analysis of the interaction  
487 between pesticide exposure and nutrition in honey bees (*Apis mellifera*). *J Insect Physiol* 71:  
488 177-190.
- 489 **Schmidt, J. O. 1984.** Feeding Preferences of *Apis-Mellifera* L (Hymenoptera, Apidae) - Individual Versus  
490 Mixed Pollen Species. *J Kansas Entomol Soc* 57: 323-327.
- 491 **Schmidt, J. O., S. C. Thoenes, and M. D. Levin. 1987.** Survival of Honey-Bees, *Apis-Mellifera*  
492 (Hymenoptera, Apidae), Fed Various Pollen Sources. *Ann Entomol Soc Am* 80: 176-183.
- 493 **Suchail, S., D. Guez, and L. P. Belzunces. 2001.** Discrepancy between acute and chronic toxicity induced  
494 by imidacloprid and its metabolites in *Apis mellifera*. *Environ Toxicol Chem* 20: 2482-2486.
- 495 **Toth, A. L., and G. E. Robinson. 2005.** Worker nutrition and division of labour in honeybees. *Anim Behav*  
496 69: 427-435.
- 497 **Williamson, S. M., D. D. Baker, and G. A. Wright. 2013.** Acute exposure to a sublethal dose of  
498 imidacloprid and coumaphos enhances olfactory learning and memory in the honeybee *Apis*  
499 *mellifera*. *Invertebr Neurosci* 13: 63-70.

500 **Wilson-Rich, N., S. T. Dres, and P. T. Starks. 2008.** The ontogeny of immunity: Development of innate  
501 immune strength in the honey bee (*Apis mellifera*). *J Insect Physiol* 54: 1392-1399.  
502 **Winston, M. L. 1987.** The biology of the honey bee, Harvard University Press, Cambridge, Mass.  
503 **Wu, J. Y., C. M. Anelli, and W. S. Sheppard. 2011.** Sub-Lethal Effects of Pesticide Residues in Brood  
504 Comb on Worker Honey Bee (*Apis mellifera*) Development and Longevity. *Plos One* 6.

505

506

507

508

509

510

511

512

513

514

515

516

517

518

519

520

521

522

523

524

525

526

527

528

529

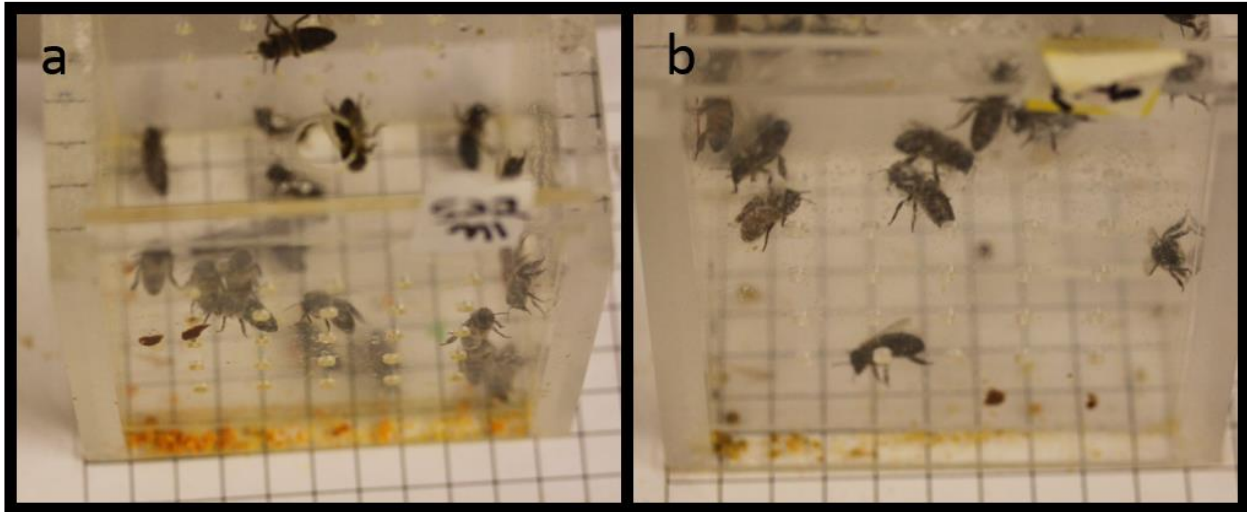

530

531

532 **Fig. 1:** Rejection of cyhalothrin-contaminated pollen. Representative images are shown for a)  
533 Cages of bees fed *Taraxacum sp.* pollen that was contaminated with cyhalothrin. After 24 hours,  
534 a significant amount of pollen (orange debris at bottom) was not consumed and was pushed  
535 under the door of the cage. b) Little pollen remains in cages fed polyfloral or *Salix sp.* because  
536 this pollen was not rejected by bees.

537

538

539

540

541

542

543

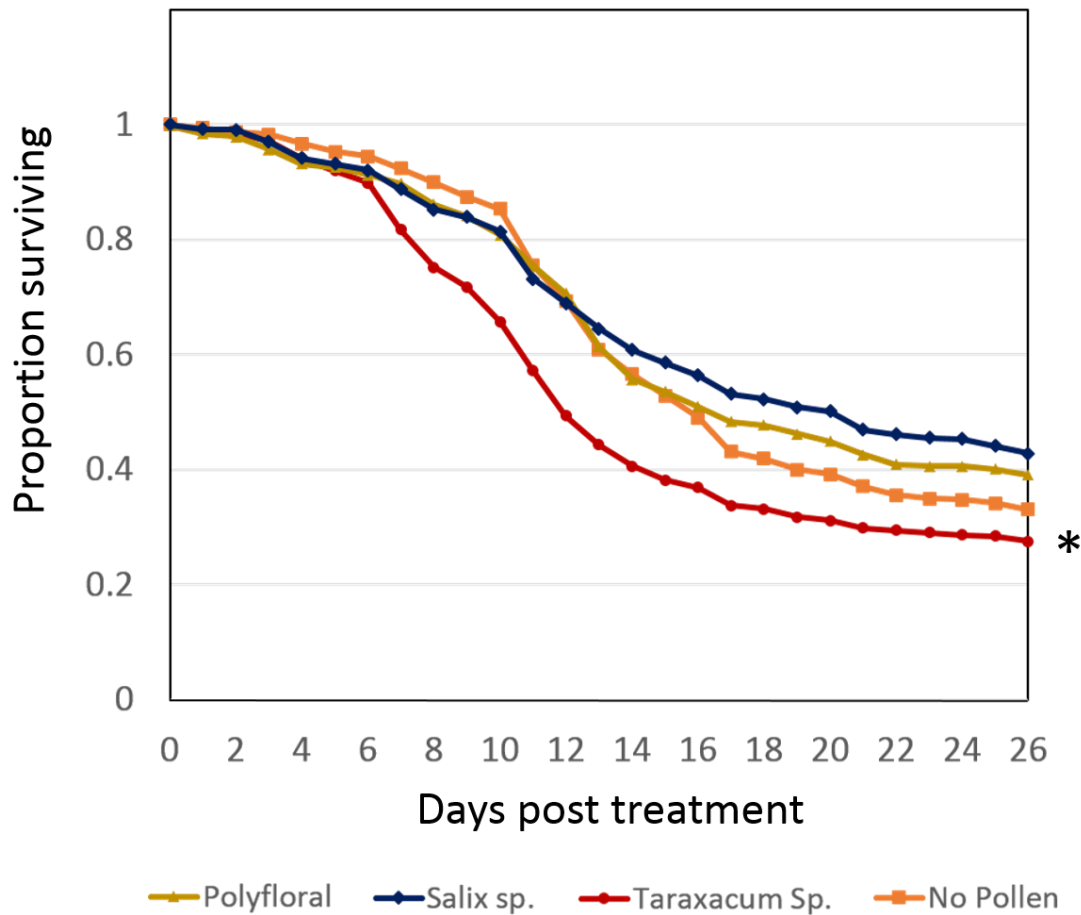

544

545

546 **Fig. 2:** Proportion of original 60 bees surviving per cage averaged across all cages in a treatment.

547 Asterisk indicates significant difference: significantly fewer *Taraxacum*-fed bees survived

548 compared to all other groups, which did not differ from each other (Cox proportional hazards

549 model, alpha adjusted  $p < 0.033$ ).

550

551

552

553

554



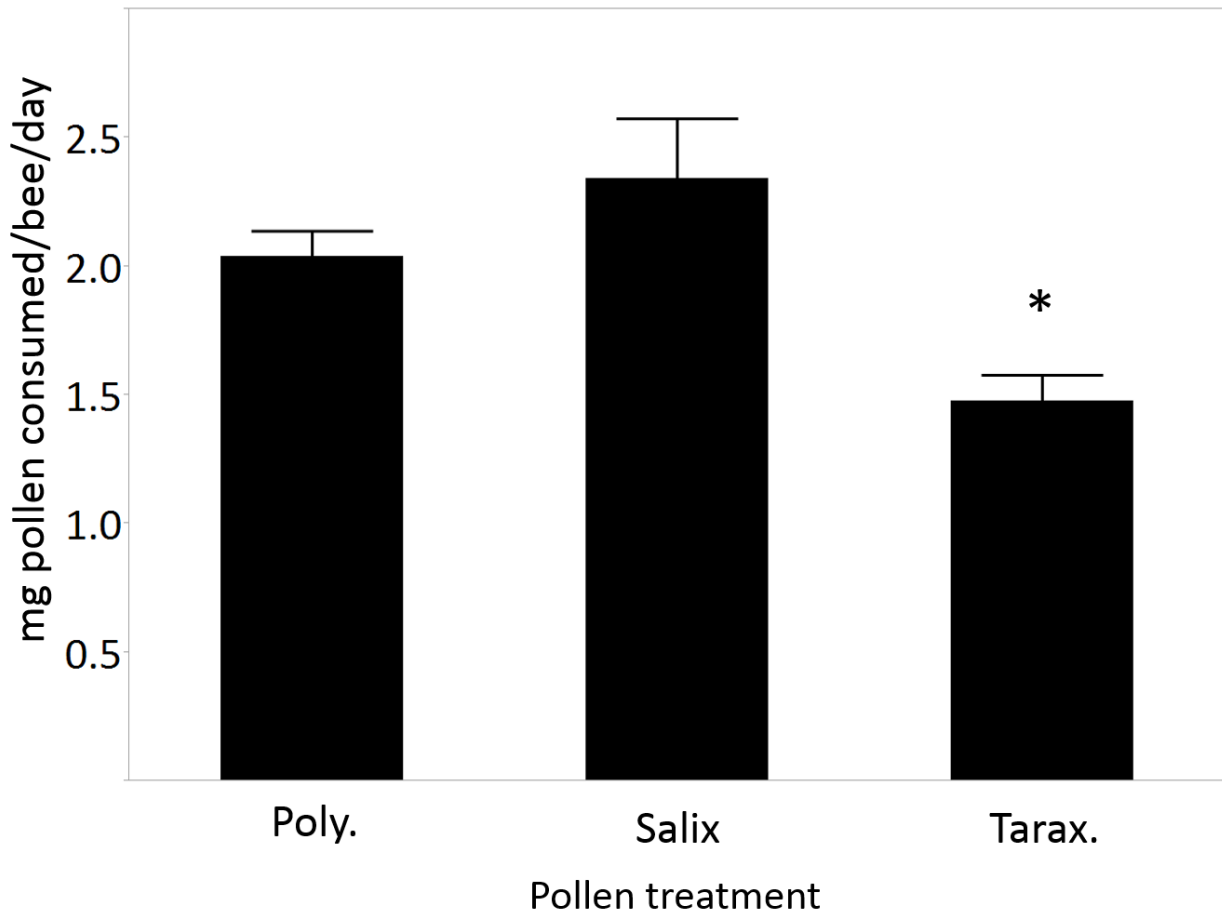

555

556

557 **Fig. 3:** Mean +/- SE milligrams of pollen consumed per bee per day of 6 days in cages fed  
558 polyfloral, *Salix sp.*, or *Taraxacum sp.* pollen. Asterisk indicates significant differences:  
559 *Taraxacum*-fed bees consumed significantly less pollen than the other groups (Kruskal-Wallis  
560 ANOVA, Steel-Dwass posthoc test,  $p < 0.05$ )

561

562

563

564

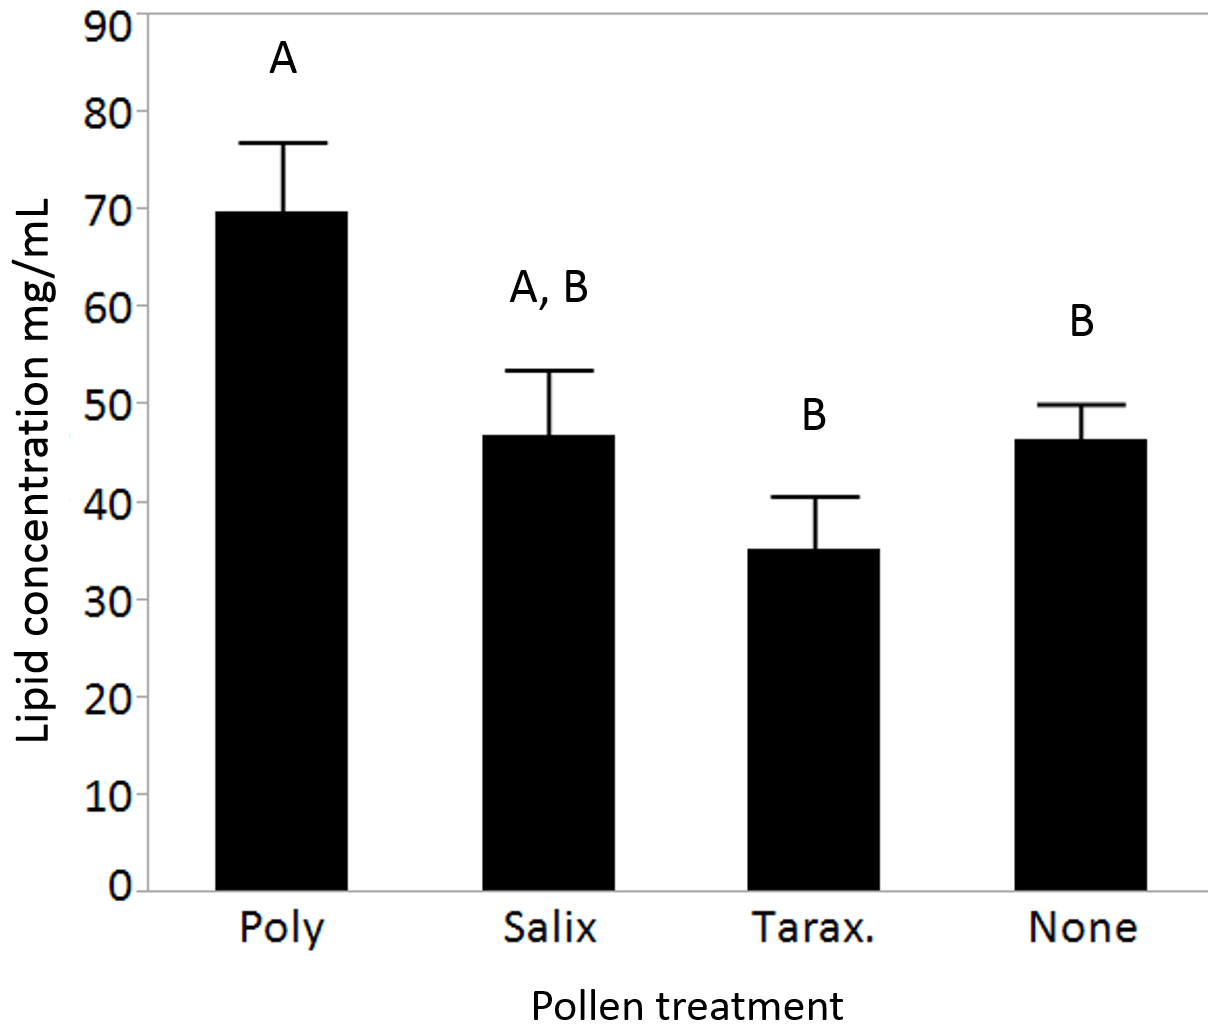

565

566

567 **Fig. 4:** Mean  $\pm$  SE lipid concentration (mg/mL) of 14-day-old bees collected from cages fed  
568 polyfloral pollen, *Salix sp.* pollen, *Taraxacum sp.* pollen, or no pollen. Letters denote significant  
569 differences (Tukey HSD,  $p < 0.05$ ).

570

571

572

573

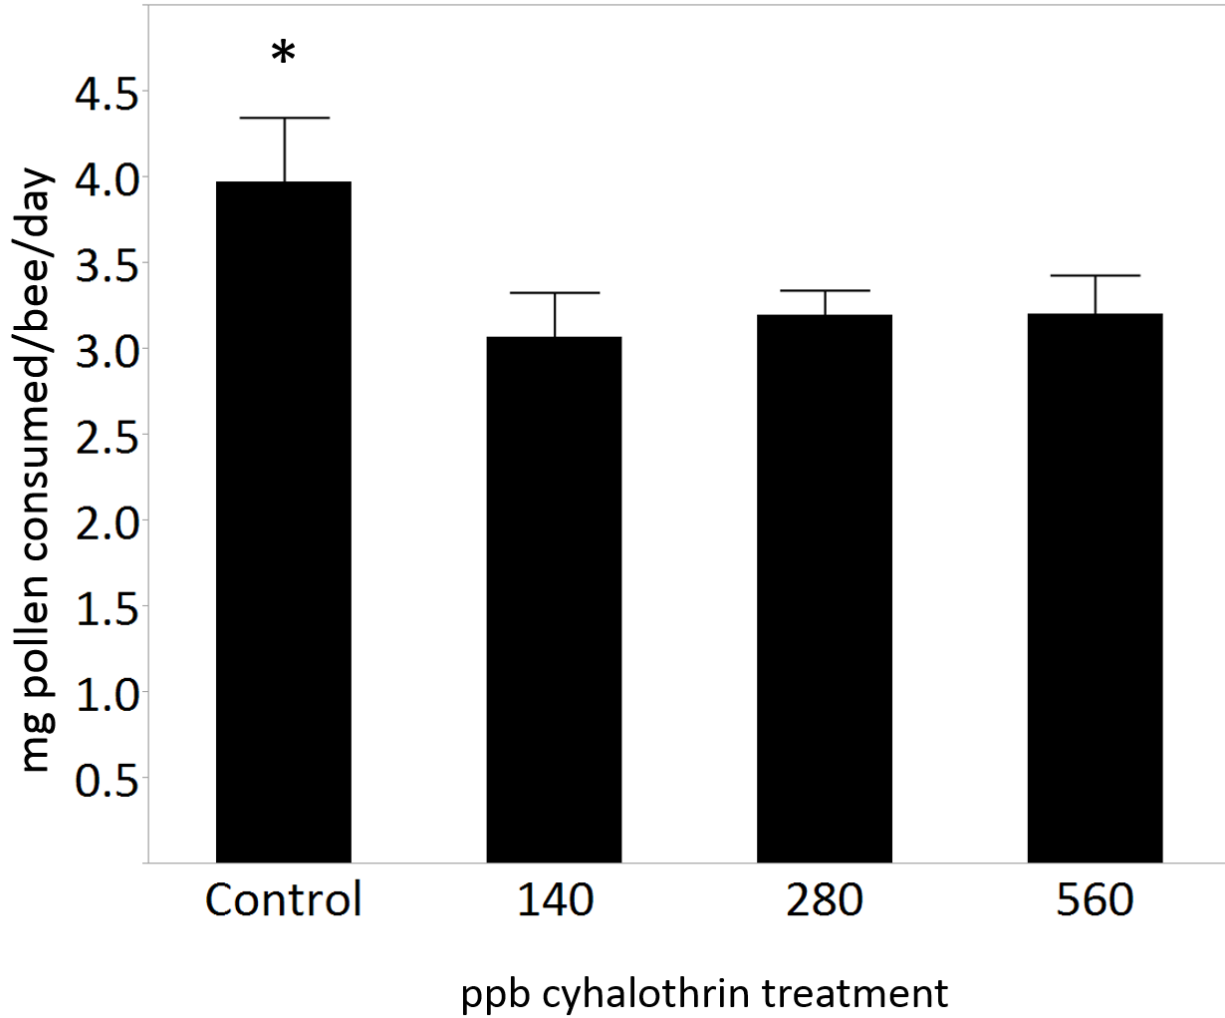

574

575 **Fig. 5:** Mean +/- SE milligrams of pollen consumed per bee per day over 7 days in cages fed  
576 unmanipulated polyfloral pollen (control) or pollen contaminated with 140, 280, or 560 ppb  
577 cyhalothrin; asterisk denotes significant differences (repeated measures ANOVA,  $p < 0.0214$ )

578

579

580

581

582

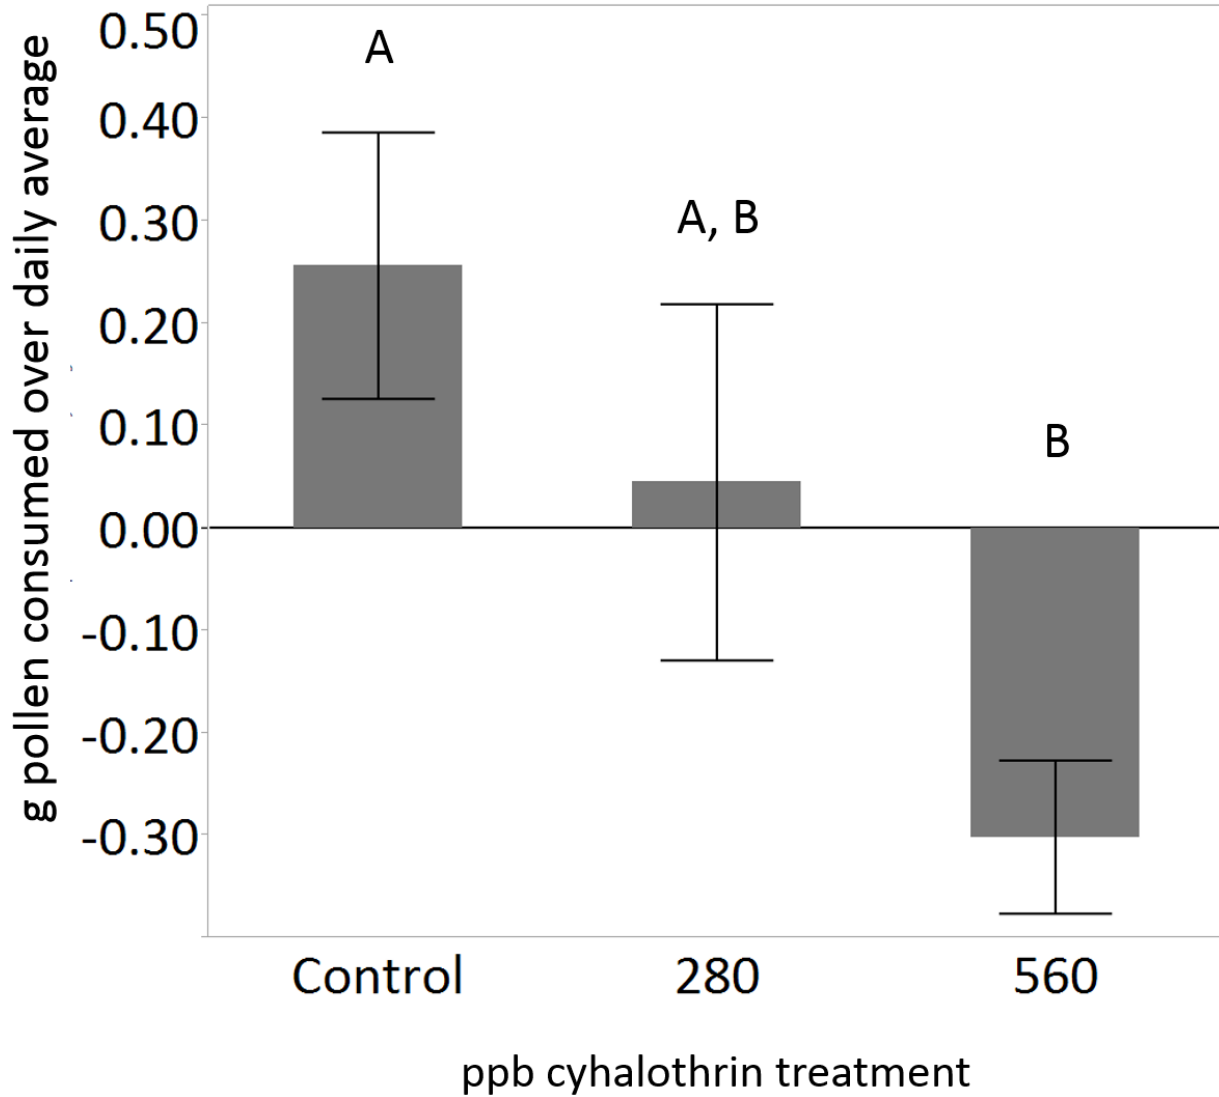

583

584

585 **Fig. 6:** Mean +/- SE of the proportion of pollen consumed over the daily average when nucleus  
586 hives were presented with unmanipulated polyfloral pollen (control) or polyfloral pollen treated  
587 with 280 ppb or 560 ppb cyhalothrin. Letters denote significant differences (repeated measures  
588 ANOVA,  $p < 0.01667$ ).

589
